# Supplementary material for: Overexpression of Soybean-Derived Lunasin in Wheat and Assessment of Its Anti-Proliferative Activity in Colorectal Cancer HT-29 Cells
Source: MDPI journal article supplement (doi:10.3390/ijms21249594), 2020-12-16
Supplement: s1 [file s1]

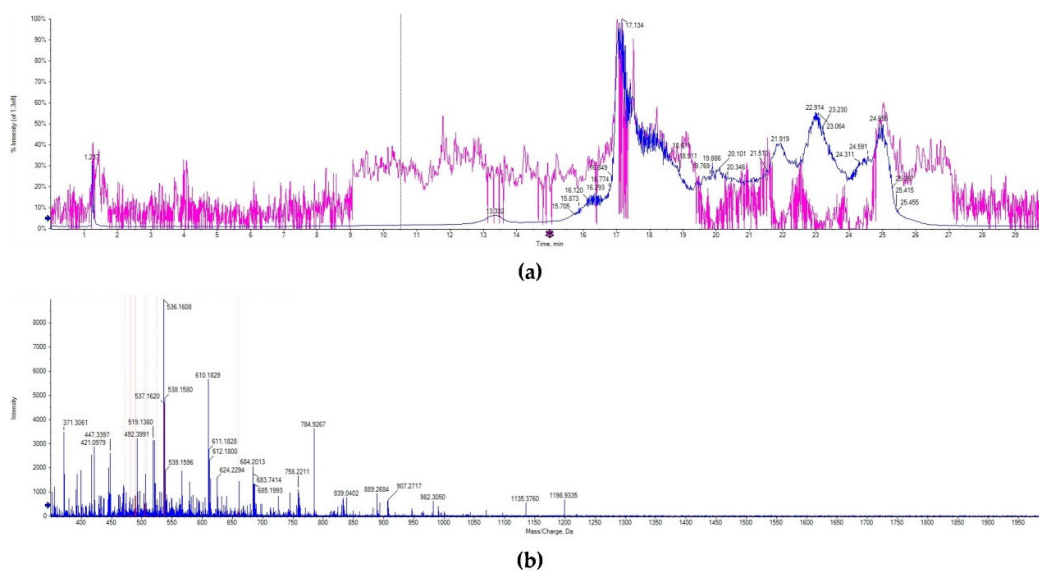

**Figure S1.** UPLC-MS/MS analysis of wild-type wheat. (a) The chromatogram of wild-type wheat. (b) Mass spectrum acquired from the peak at 10.510min in the chromatogram of wild-type wheat.
